# Supplementary material for: Identification of key genes as potential diagnostic biomarkers in sepsis by bioinformatics analysis
Source: PeerJ. 2024 Jun 18;12:e17542. doi: 10.7717/peerj.17542 (PMC11192024; doi:10.7717/peerj.17542)
Supplement: Supplemental Information 1 [file peerj-12-17542-s001.xlsx]

## Sheet: Sheet1
Table S1: Overview of sepsis datasets used in this study
	GEO accession	Sepsis	Critical illness	Country of origin of patients	GEO GPL	Assay Type
Discovery datasets	GSE28750	10 (ICU septic patients)	11(post-surgical patients with infection-negative systemic inflammation)	Australia	GPL570	Array
	GSE74224	74 (ICU septic patients)	31(post-surgical patients with infection-negative systemic inflammation)	Australia	GPL5175	Array
Validation dataset	GSE131761	81 (post-surgical septic shock patients)	33 ( post-surgical non-septic shock patients)	Spain	GPL13497	Array
