# Supplementary material for: Identification of key genes as potential diagnostic biomarkers in sepsis by bioinformatics analysis
Source: PeerJ. 2024 Jun 18;12:e17542. doi: 10.7717/peerj.17542 (PMC11192024; doi:10.7717/peerj.17542)
Supplement: Supplemental Information 2 [file peerj-12-17542-s002.xlsx]

## Sheet:   sepsis cohort
Table S2: Characteristics of 22 Sepsis and 10 Non-sepsis patients
Measure		Sepsis (n=22)		Nonsepsis (n=10)
Age (yrs; median(IQR))		64 (56-76)		60 (53-66)
Male (n; %)		14 (64%)		7 (70% )
SOFA score (median(IQR))		9 ( 5-11 )		—
ASA classification
III (n; %)		7 (32%)		3 ( 30% )
IV (n; %)		15 (68%)		7 ( 70% )
Comorbidities
Hypertension (n; %)		8 ( 36% )		4 ( 40% )
Diabetes (n; %)		3 ( 14% )		2 ( 20% )
Coronary heart disease (n; %)		2 (9%)		1 ( 10% )
Source of infection
obstructive urinary tract disease (n; %)		7 (32%)		—
gastrointestinal tract perforation (n; %)		9 (41%)		—
acute purulent obstructive cholangitis (n;%)		6 (27%)		—
SOFA: sequential organ failure assessment
ASA: American society of Aneshesiologists physical status classification system
