# Supplementary material for: Identification of key genes as potential diagnostic biomarkers in sepsis by bioinformatics analysis
Source: PeerJ. 2024 Jun 18;12:e17542. doi: 10.7717/peerj.17542 (PMC11192024; doi:10.7717/peerj.17542)
Supplement: Supplemental Information 3 [file peerj-12-17542-s003.xlsx]

## Sheet: Sheet1
Table S3： The sequences of siRNAs used in the study
Gene	Forward (5′→3′)	Reverse (5′→3′)
GAPDH	CTGGGCTACACTGAGCACC	AAGTGGTCGTTGAGGGCAATG
LTF	ACCAACAGGCTAAATTTGGG	GTGTTGTCATTGAACAGAAGG
LCN2	CCACCTCAGACCTGATCCCA	CCCCTGGAATTGGTTGTCCTG
ELANE	CTCGCGTGTCTTTTCCTCG	GCCGACATGACGAAGTTGG
MPO	AGCAGGTCATGAGGATTGG	AGGCATTGTATCCTGGGAG
CEACAM8	CCTATAATTCGACGGTTGGCAT	TGCTCAGCTCACTATTGAAGC
