# Supplementary material for: Identification of key genes as potential diagnostic biomarkers in sepsis by bioinformatics analysis
Source: PeerJ. 2024 Jun 18;12:e17542. doi: 10.7717/peerj.17542 (PMC11192024; doi:10.7717/peerj.17542)
Supplement: Supplemental Information 4 [file peerj-12-17542-s004.xlsx]

## Sheet: DEGs
DEGs	Types
ABCA13	up
OLFM4	up
MMP8	up
ADAMTS3	up
ADM	up
TSPO	up
CLU	up
C3AR1	up
AIG1	up
ALPL	up
ANXA5	up
PNP	up
VNN1	up
NRN1	up
CD177	up
GCH1	up
AMFR	up
UBE2J1	up
SEL1L3	up
ANXA3	up
LCN2	up
LGALS1	up
MPO	up
CEACAM8	up
HSPB1	up
CCNA1	up
ITGA2B	up
SELP	up
MKI67	up
HP	up
PROS1	up
CD24	up
CD274	up
CCNA2	up
CDK1	up
SDHC	up
CD44	up
CD9	up
CD63	up
APOBEC3B	up
CTSC	up
CYP19A1	up
SEC24A	up
LDLR	up
NEDD4	up
ATP13A3	up
BLOC1S1	up
BPI	up
CTSG	up
RETN	up
LTF	up
DEFA4	up
ELANE	up
GNA15	up
FCER1G	up
CCR1	up
GPR84	up
FCGR1A	up
LAIR1	up
CACNA1E	up
KCNMA1	up
DYNLL1	up
MYO10	up
TYMS	up
TOP2A	up
DTL	up
RRM2	up
KIF11	up
CKS2	up
CDC20	up
TPX2	up
SHCBP1	up
HRH4	up
RNASE2	up
CD151	up
SIGLEC10	up
NLRC4	up
TLR5	up
PDCD1LG2	up
HPR	up
SLAMF7	up
CEACAM6	up
TNFRSF17	up
CLEC1B	up
TLR10	up
FGF13	up
DACH1	up
FOLR3	up
RDX	up
HPSE	up
MAPK6	up
HK3	up
TCN1	up
PTGS1	up
CISD1	up
TREML1	up
PCOLCE2	up
MGST1	up
COX7B	up
NDUFA4	up
NDUFA1	up
PRCP	up
PI3	up
HPGD	up
PLB1	up
MTRR	up
LTA4H	up
DNAJC13	up
DNAJC9	up
GALNT2	up
STOM	up
EXOSC4	up
FADS2	up
FAM20A	up
PDGFC	up
GALNT3	up
MTHFD2	up
TMTC1	up
GPR137B	up
GSTO1	up
MS4A14	up
PTGER2	up
P4HA1	up
SMU1	up
MYL9	up
MMRN1	up
ITGA7	up
PIK3AP1	up
KREMEN1	up
LILRA5	up
LAPTM4B	up
MRPL41	up
MRPL51	up
PAPSS1	up
TPST2	up
PIWIL4	up
TDRD9	up
SCPEP1	up
SMPDL3A	up
SLC39A8	up
SYCP2	up
UBE2F	up
WSB2	up
CHI3L1	down
PTGS2	down
RUNX2	down
MME	down
ADORA3	down
CD163	down
GIMAP4	down
CPM	down
FKBP5	down
PHOSPHO1	down
SEC61A2	down
ERN1	down
ERLIN1	down
GZMB	down
PRF1	down
IFI16	down
AREG	down
REPS2	down
ARRDC3	down
ERGIC1	down
ARSG	down
SULF2	down
HGSNAT	down
FECH	down
ATP2B1	down
CALM2	down
CFD	down
TUBB2A	down
CAMK1D	down
SNCA	down
CASS4	down
ECHDC3	down
CBLB	down
PSMF1	down
EIF2AK2	down
PRKDC	down
PLA2G7	down
RNASE6	down
CCR3	down
GRAMD1C	down
SLC11A1	down
CLEC4E	down
GNLY	down
HLA-DPA1	down
HLA-DRA	down
CD2	down
IL2RB	down
KLRD1	down
SH2D1B	down
RPS6KA5	down
KLRF1	down
ZBTB16	down
NEDD9	down
PRDM1	down
HLA-DPB1	down
HIPK2	down
CEACAM4	down
CELF2	down
SAP30	down
IFIT2	down
CYP4F3	down
DAAM2	down
TPST1	down
DPEP2	down
NLRP1	down
IRS2	down
ELMO1	down
PDE3B	down
GAB2	down
HEMGN	down
RPIA	down
FGFBP2	down
FOXP1	down
RGS2	down
GPR155	down
PFKFB2	down
NDST1	down
HSH2D	down
RBP7	down
TXK	down
PTGDR	down
LPP	down
MPZL2	down
MPZL3	down
ODC1	down
PER1	down
PKN2	down
SYNE2	down
TNFSF8	down
